# Supplementary material for: Cross-platform Data Analysis Reveals a Generic Gene Expression Signature for Microsatellite Instability in Colorectal Cancer
Source: Hindawi journal article supplement (doi:10.1155/2019/6763596), 2019-03-17
Supplement: f1 [file 6763596.f1.pdf]

**A1 development**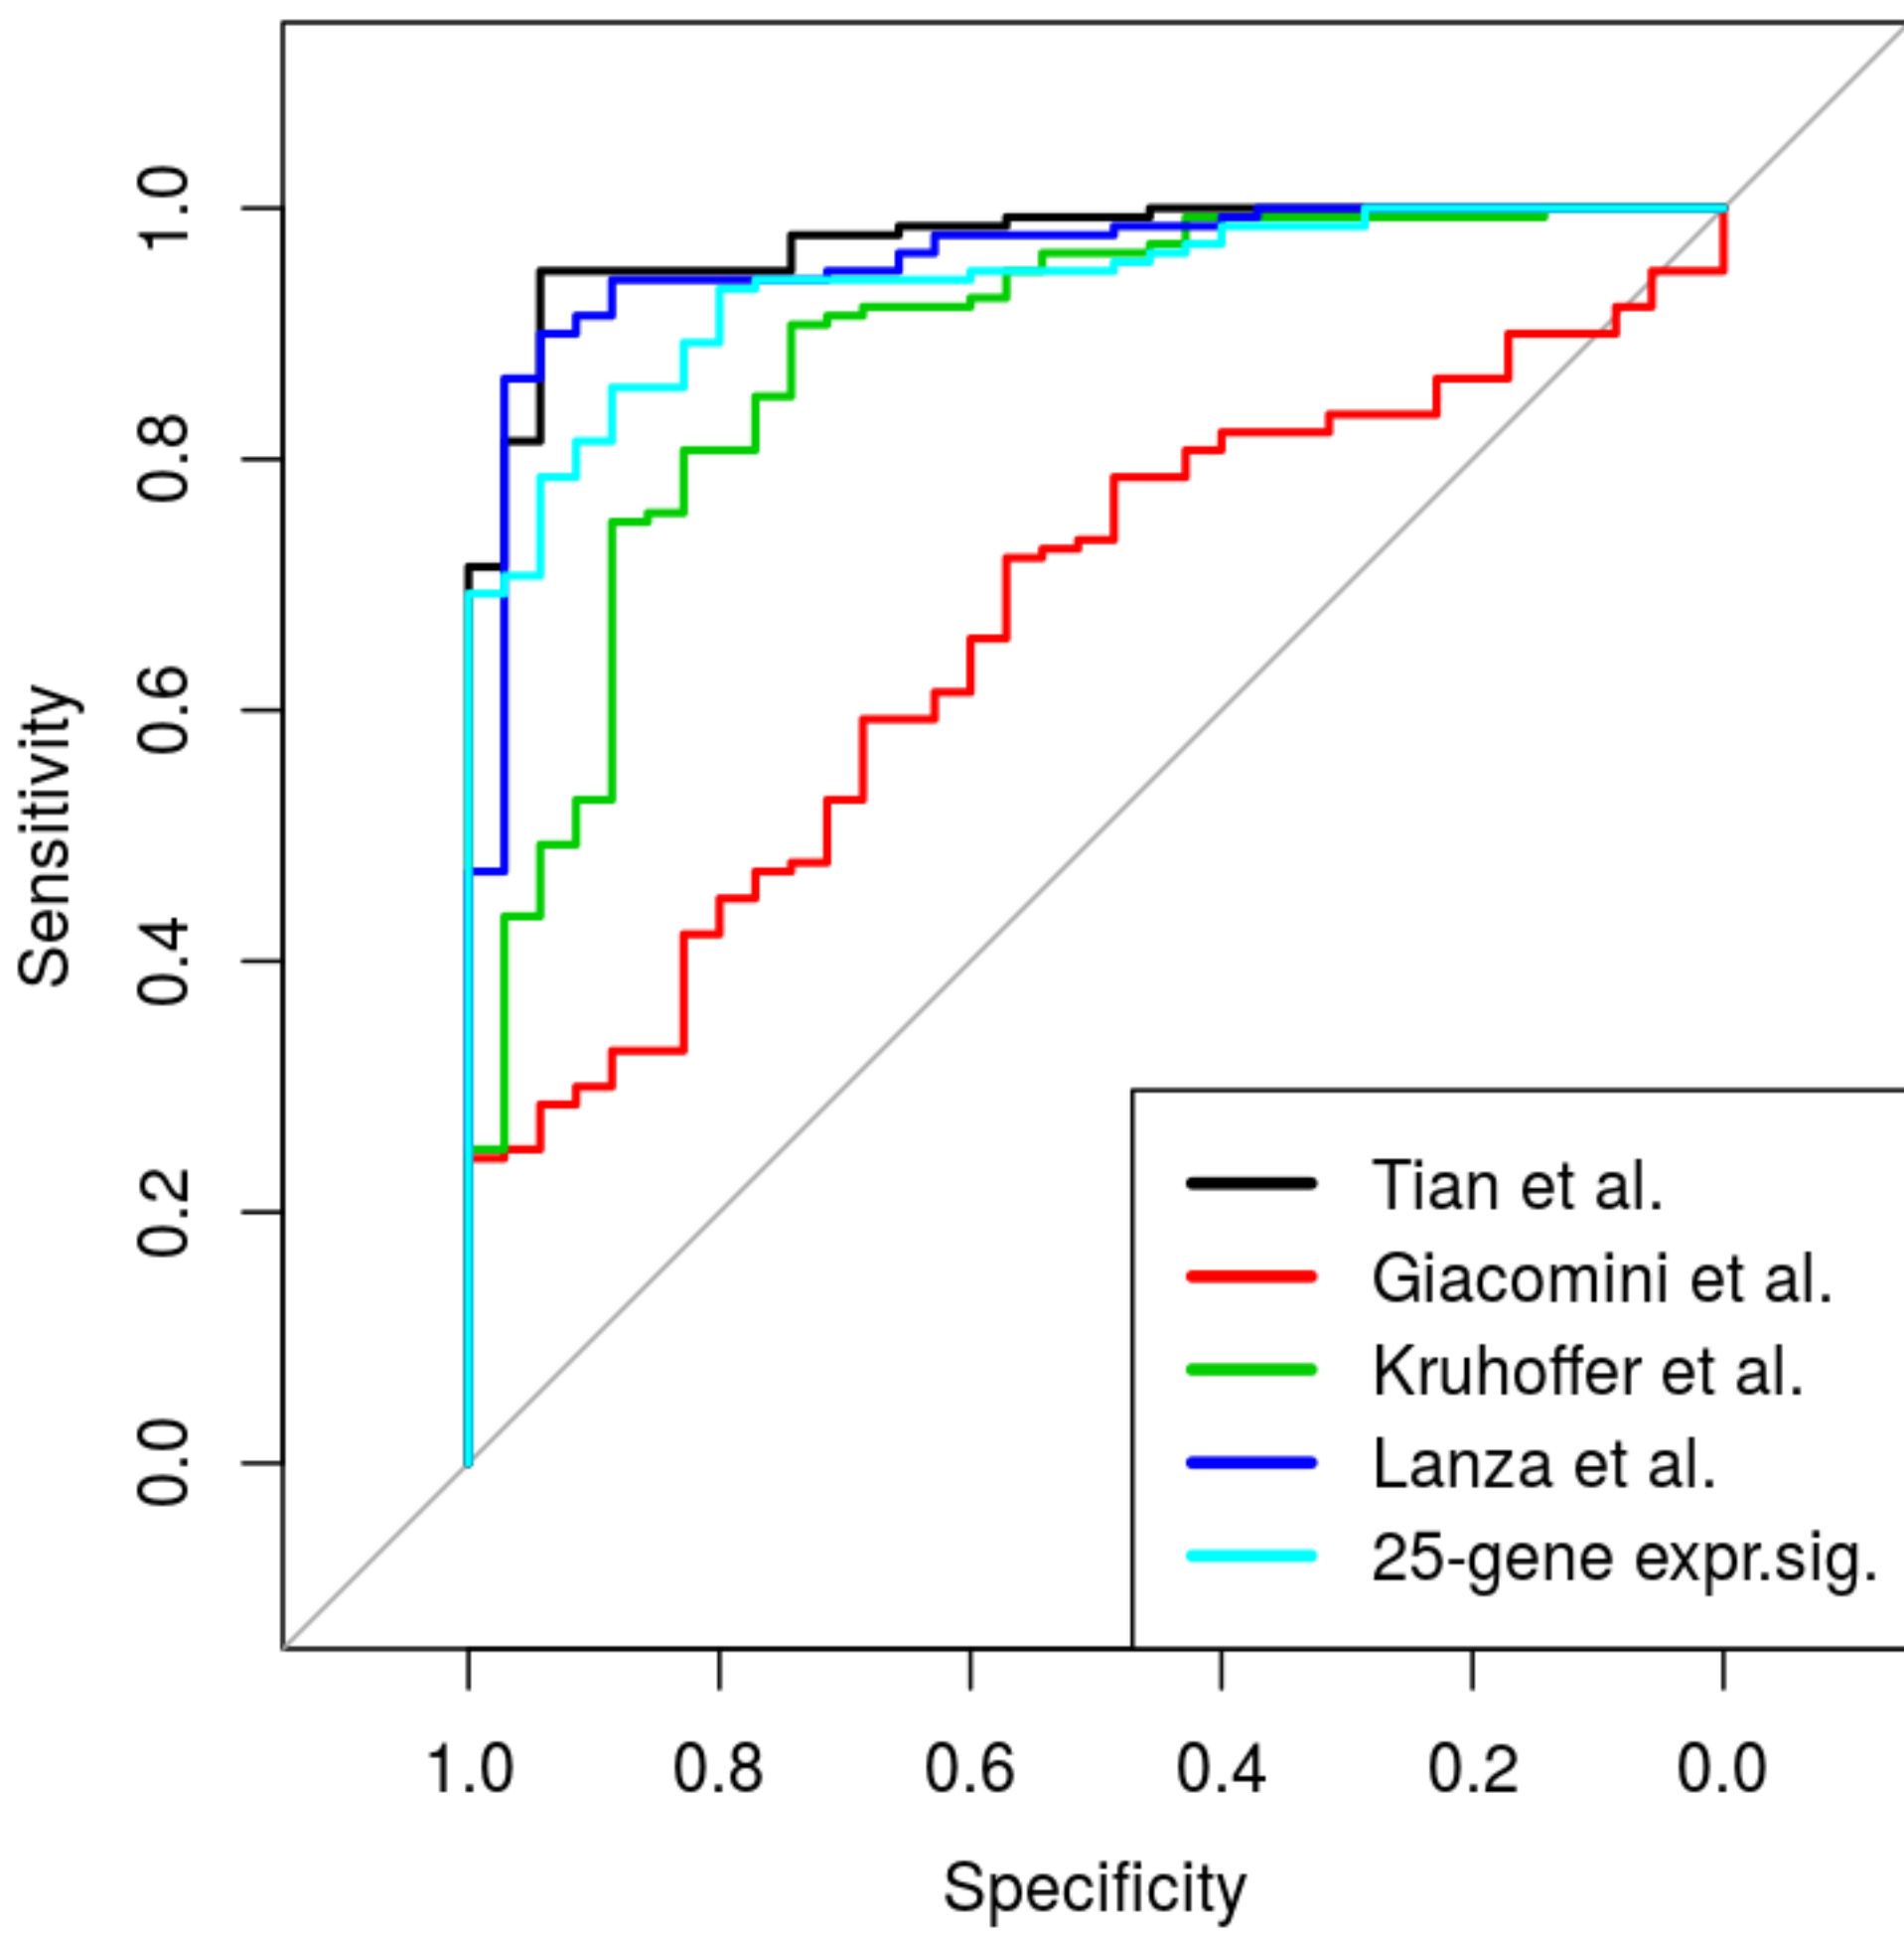**A2 development**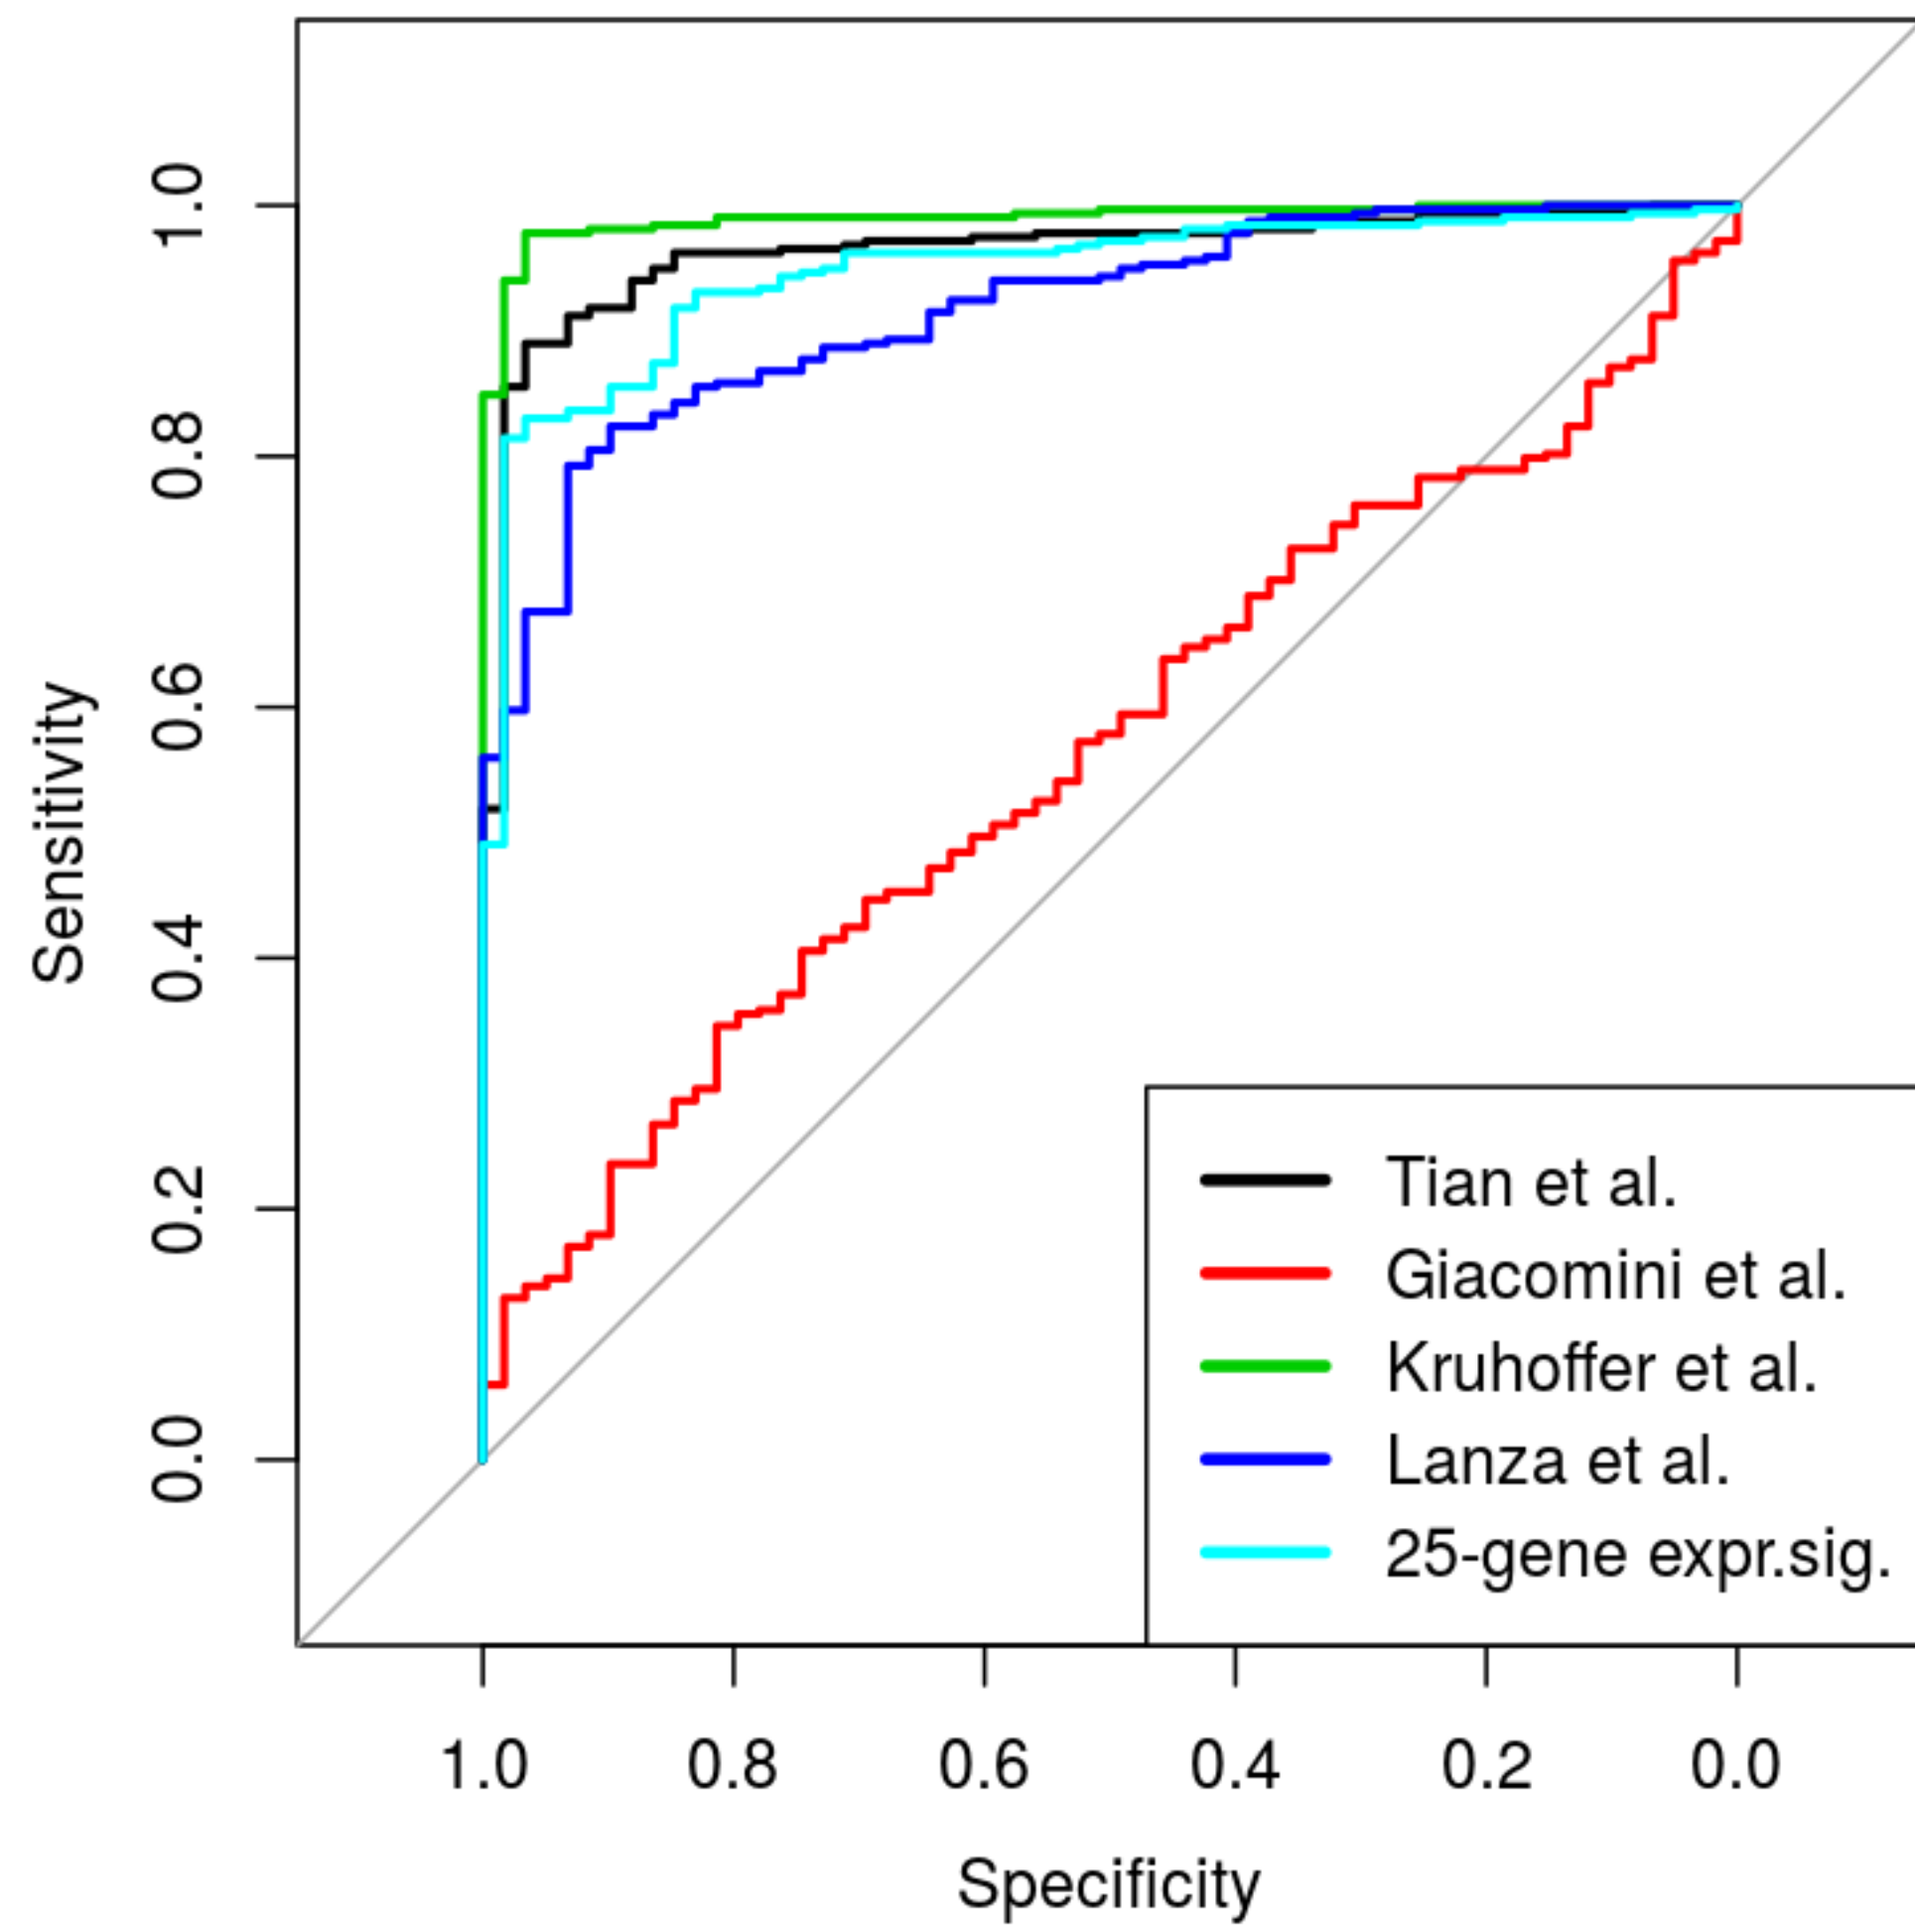**B1 validation**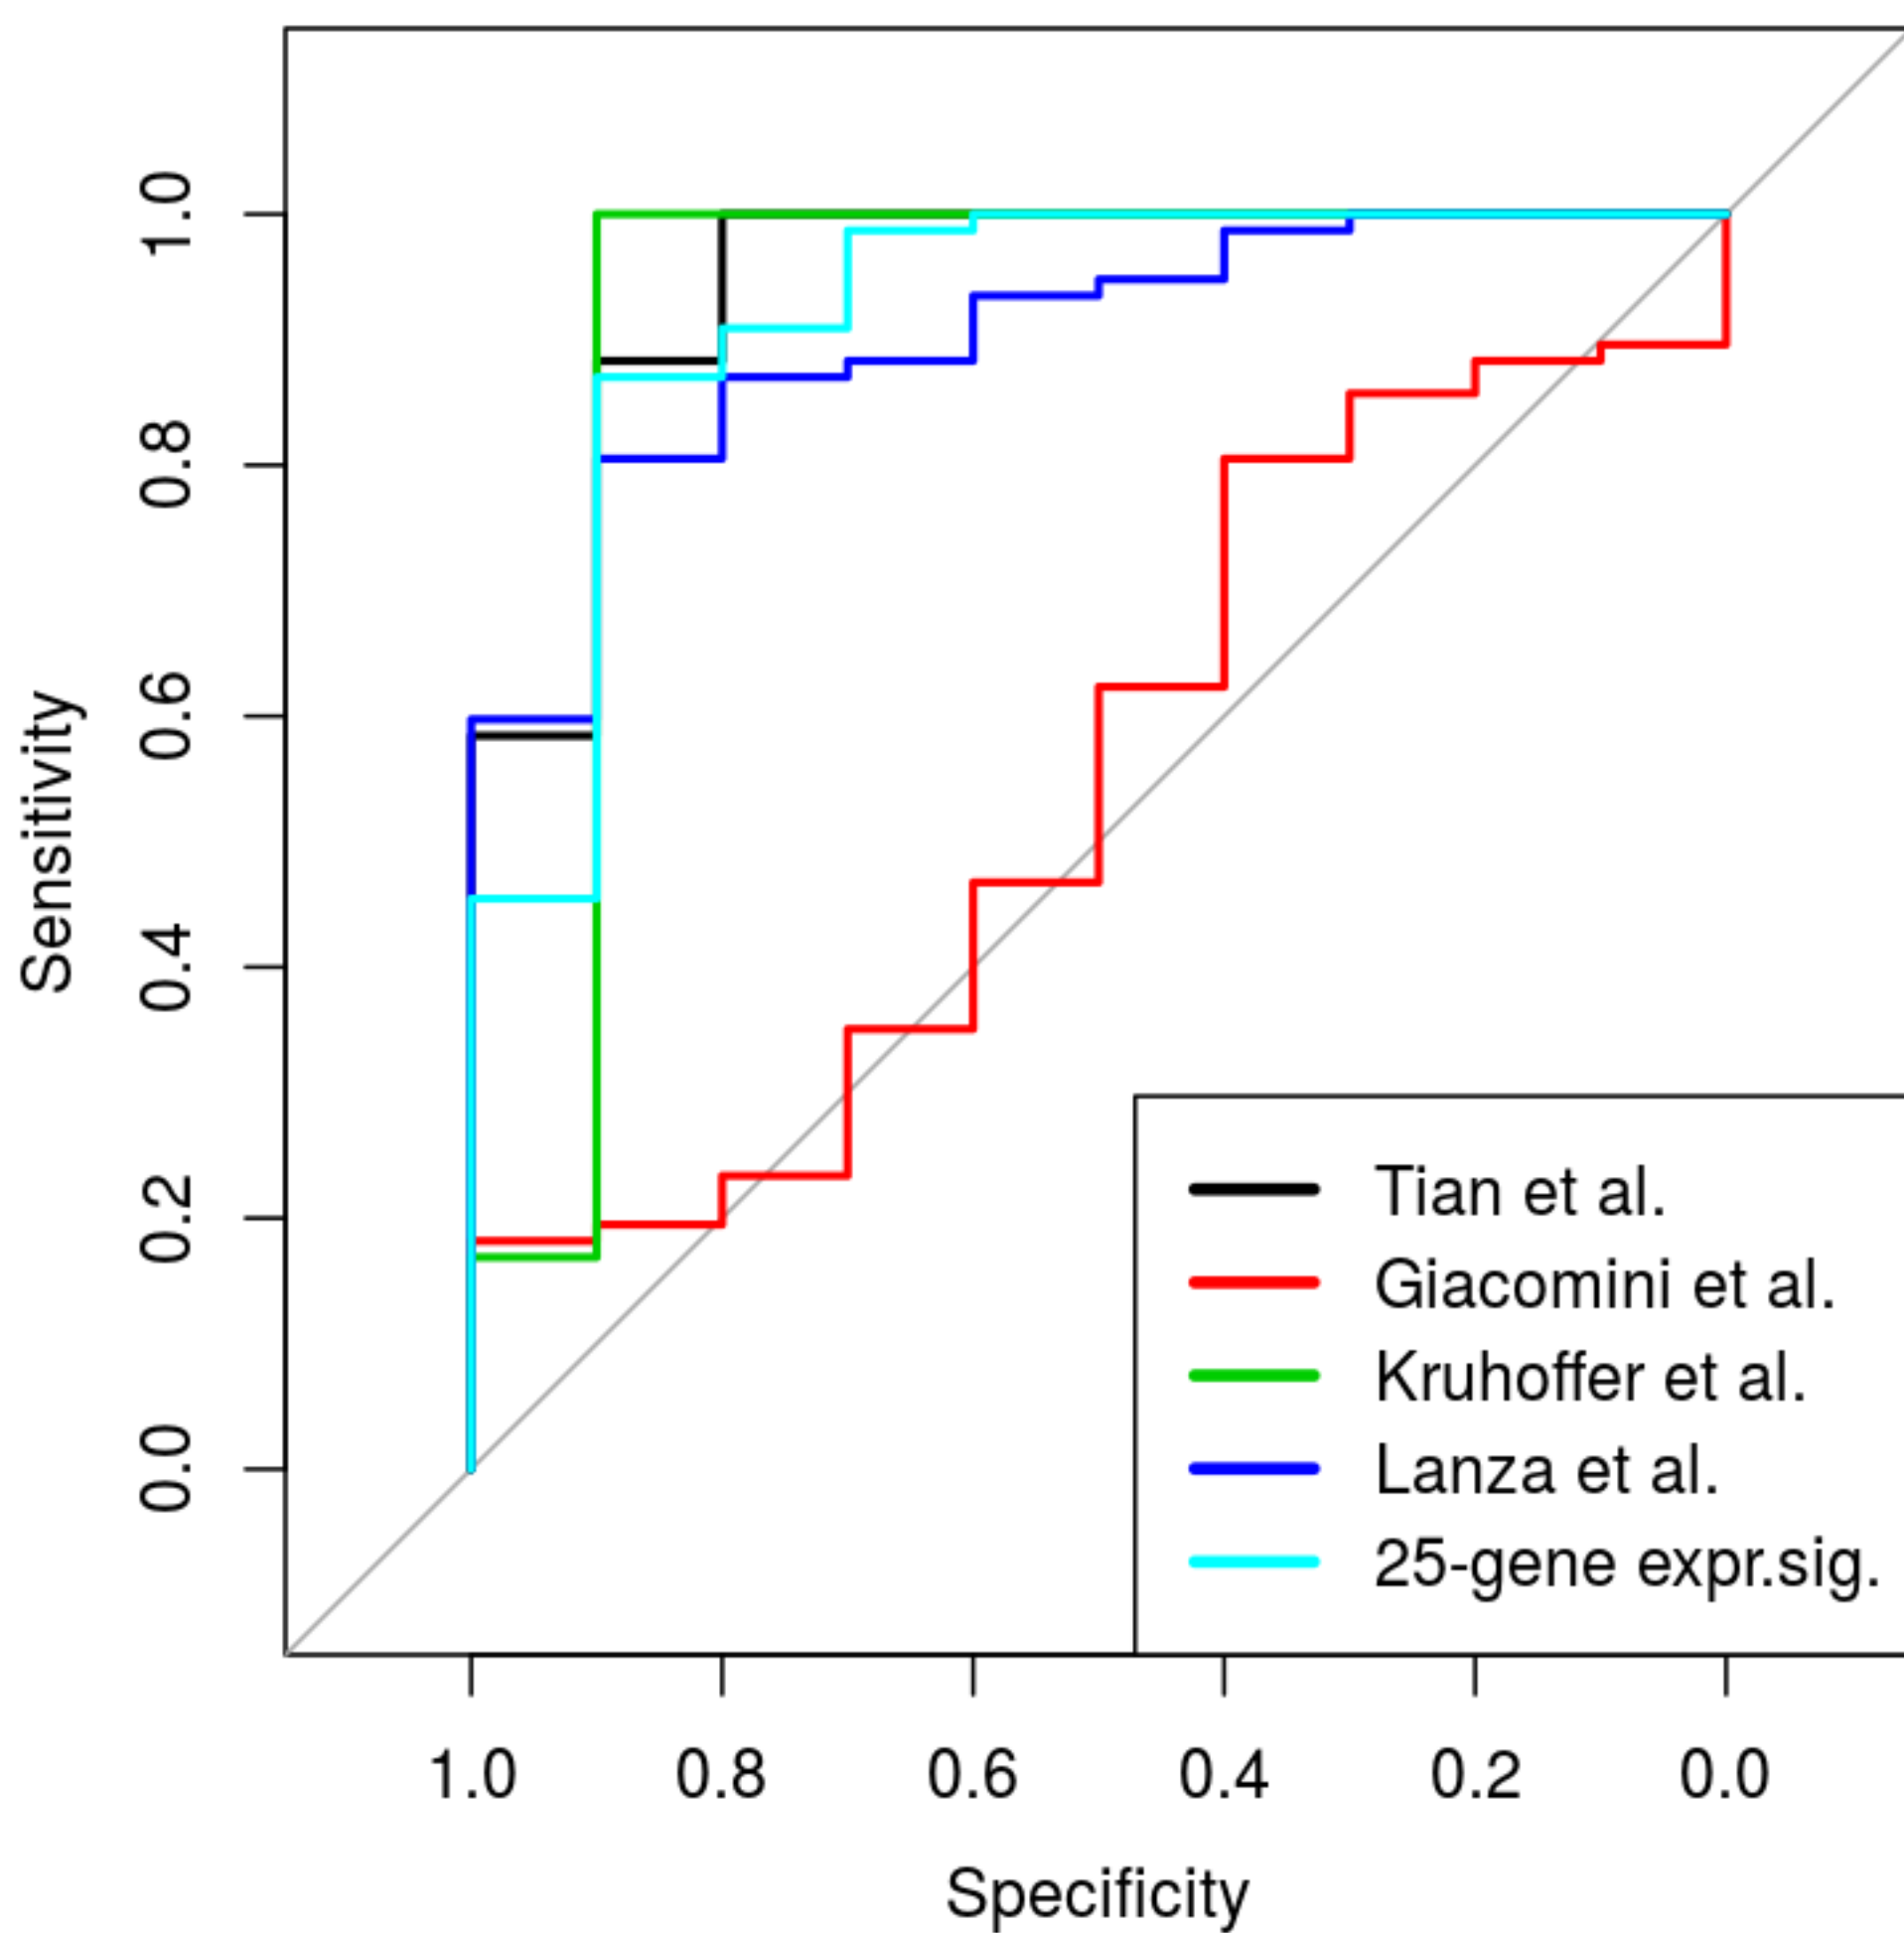**B2 validation**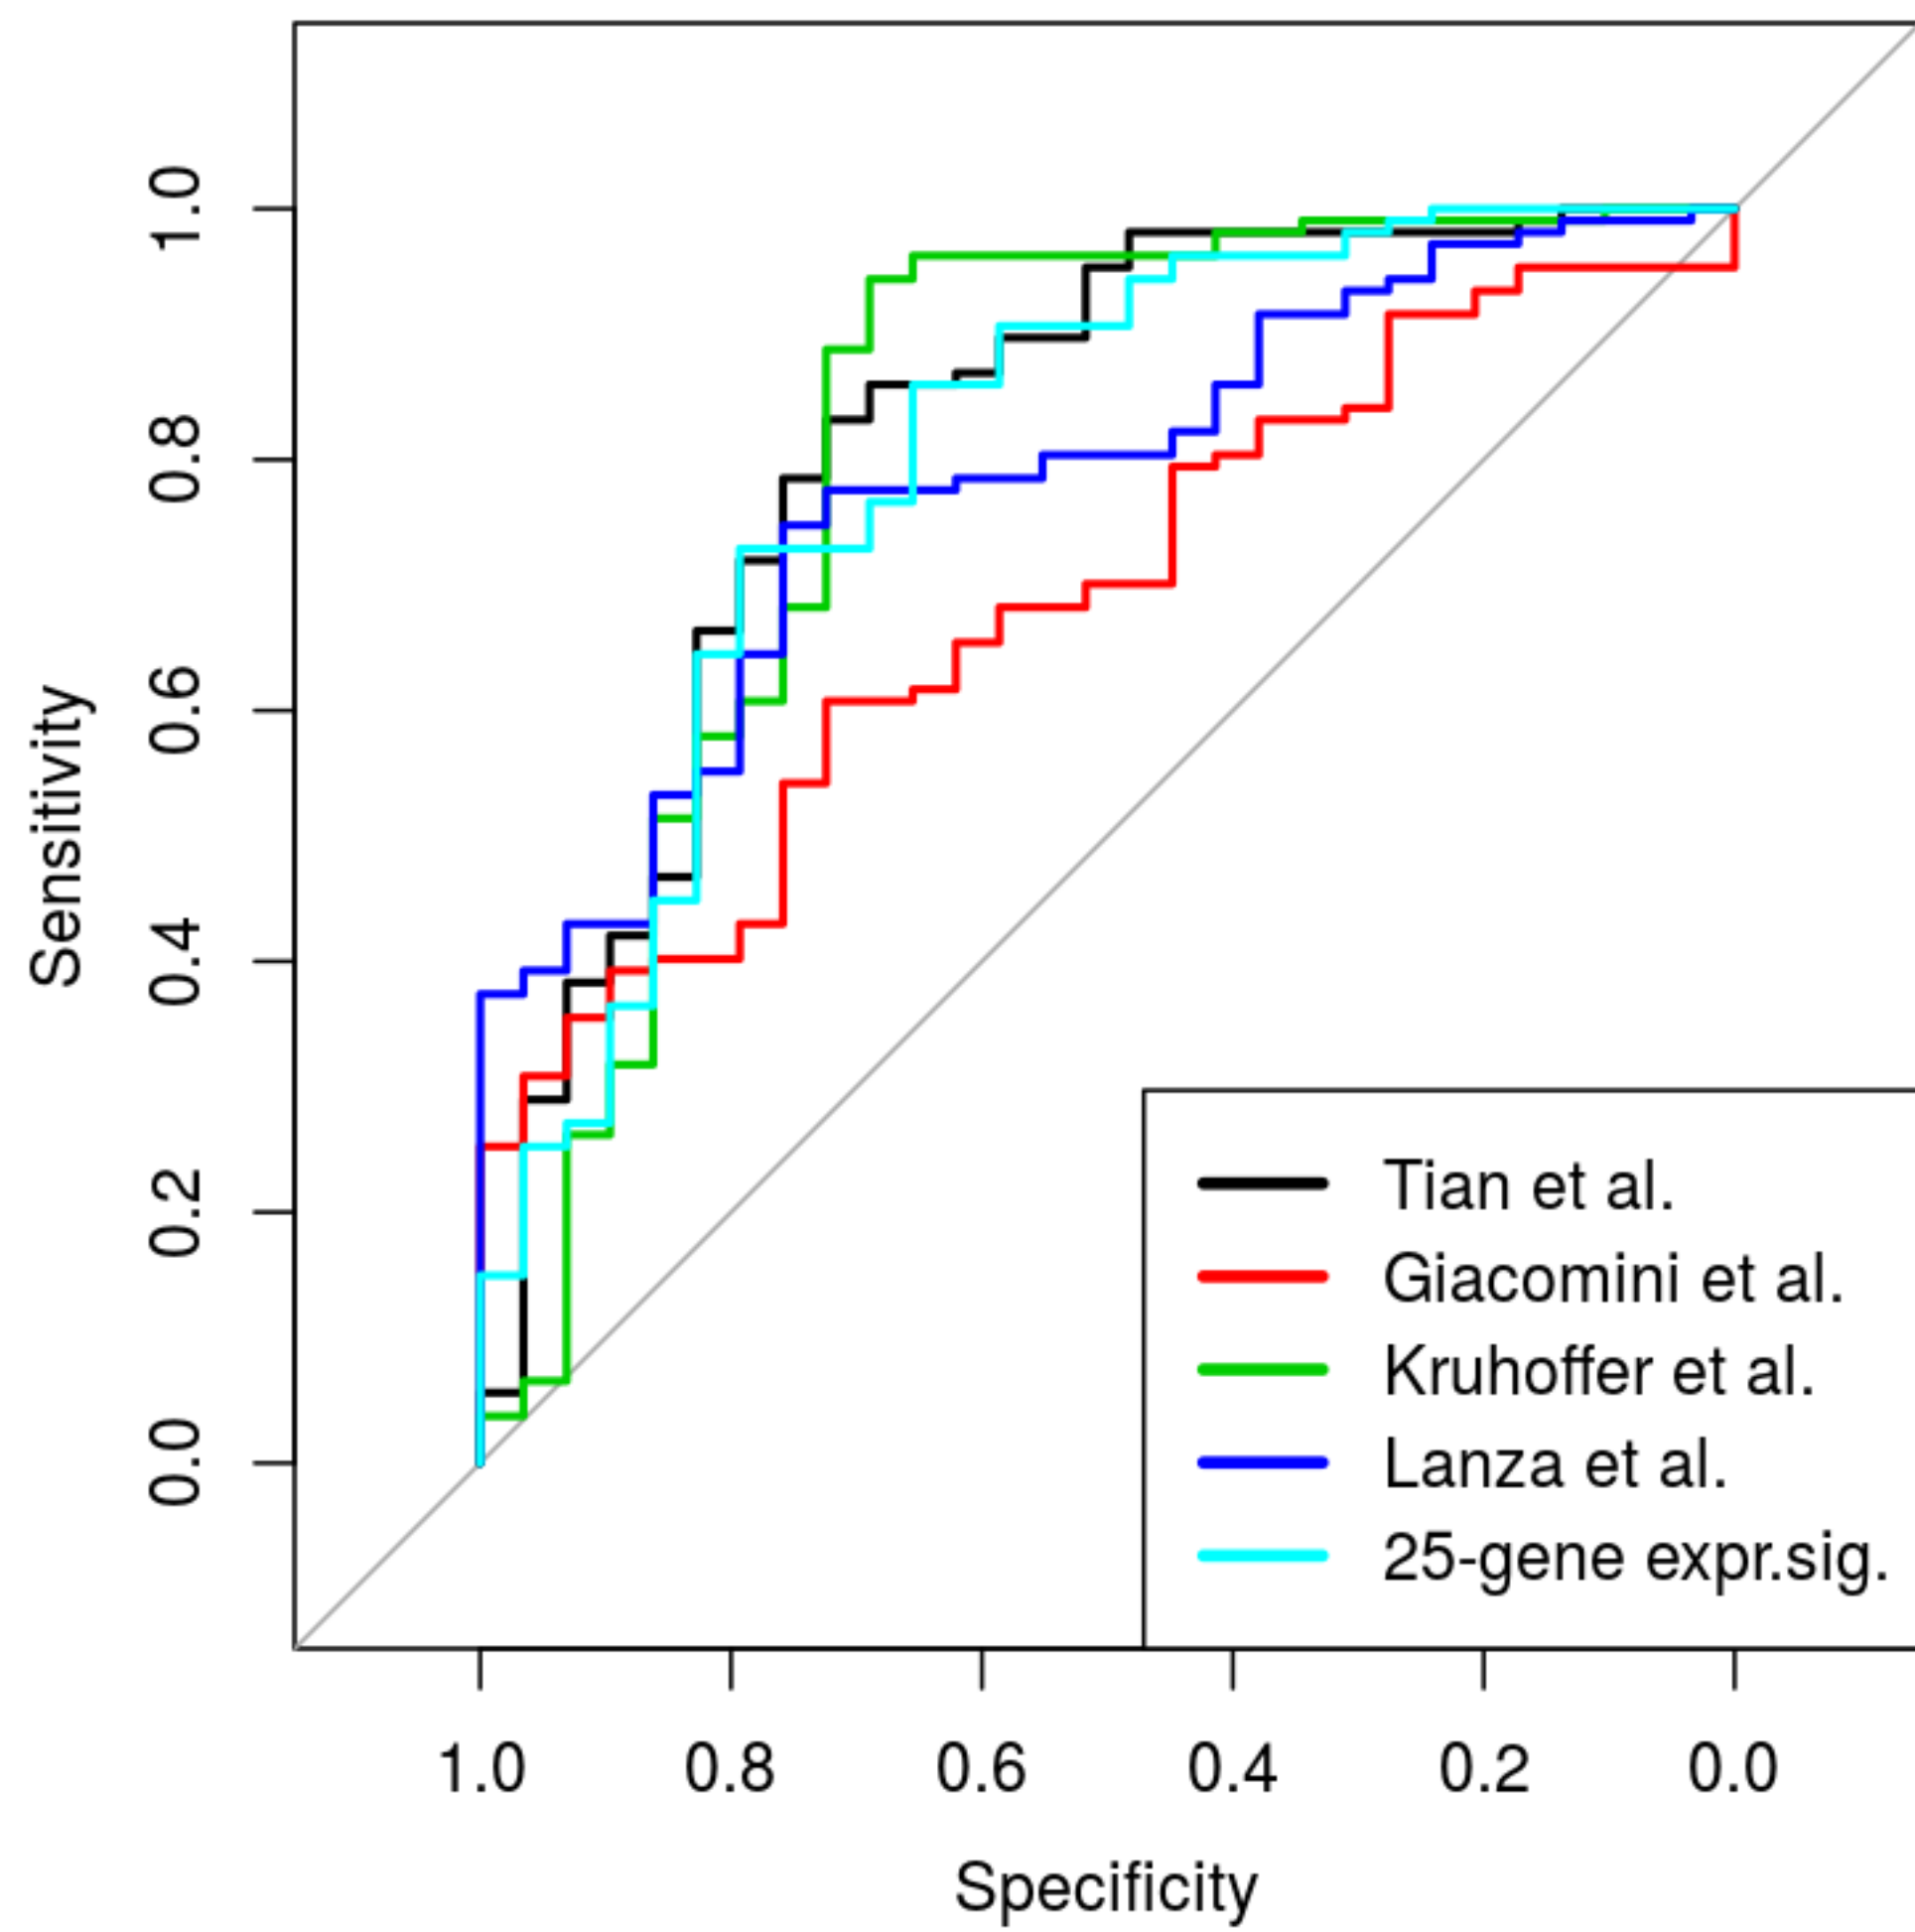**C1**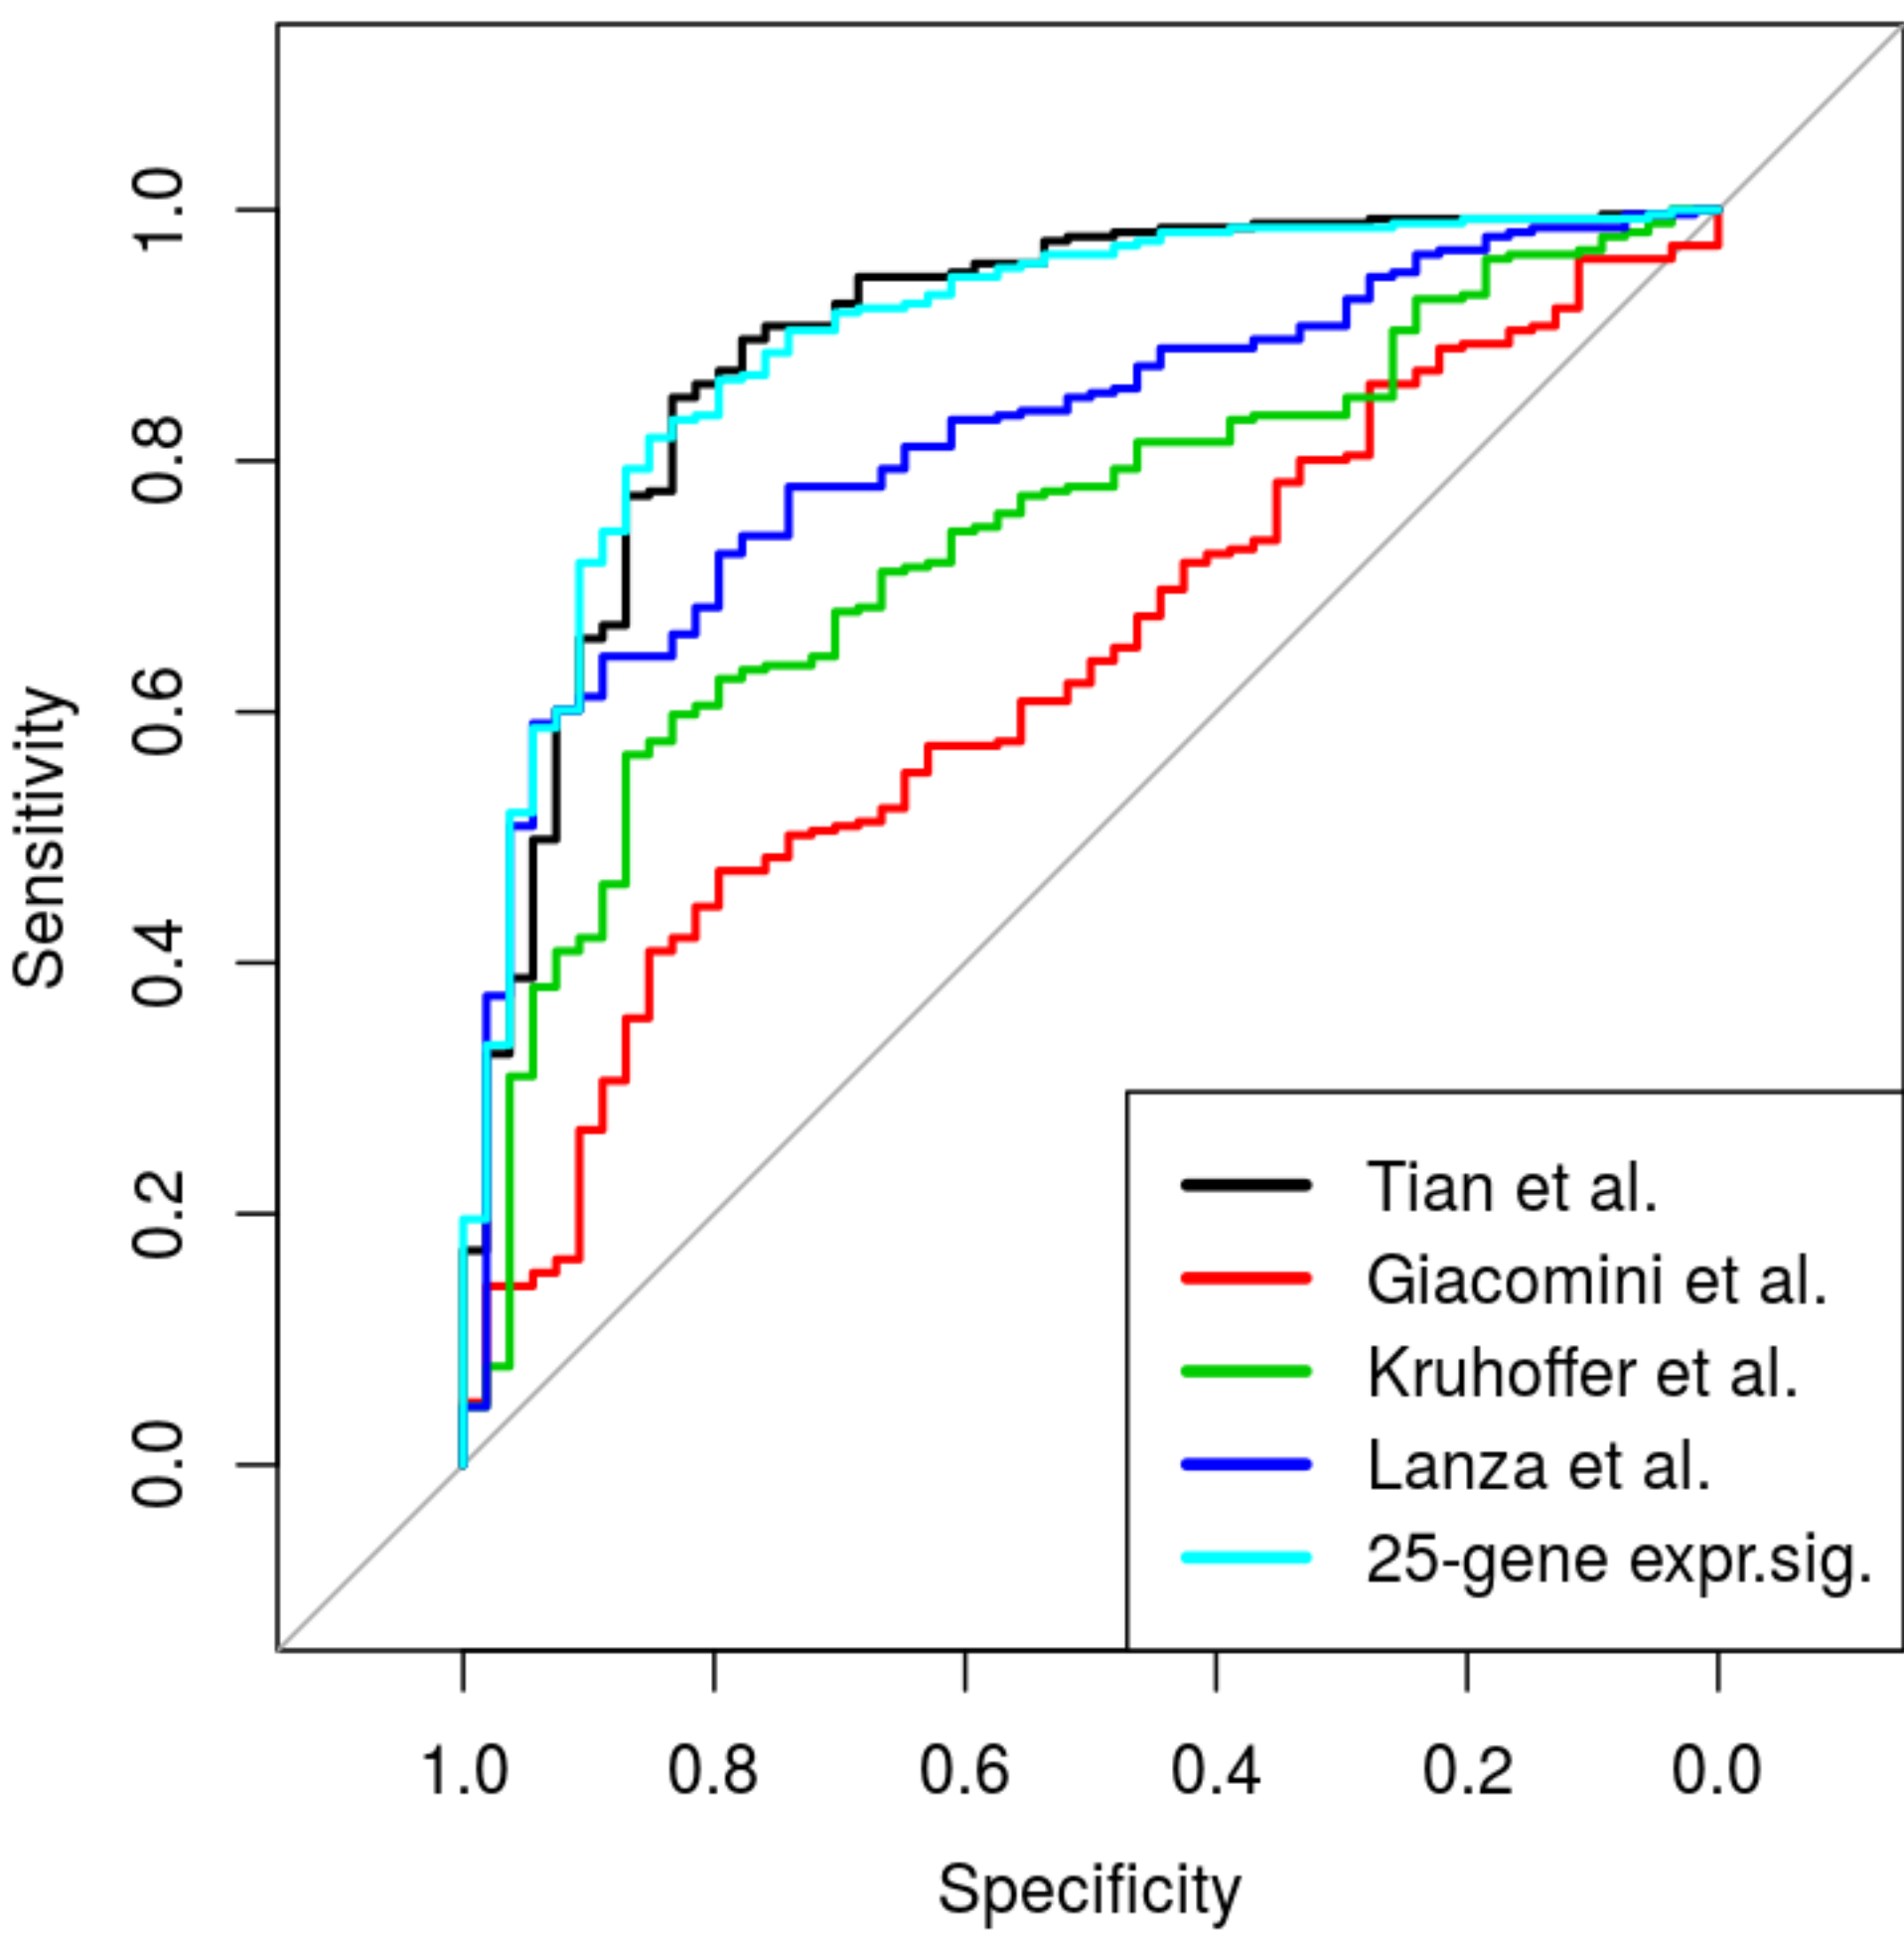**C2**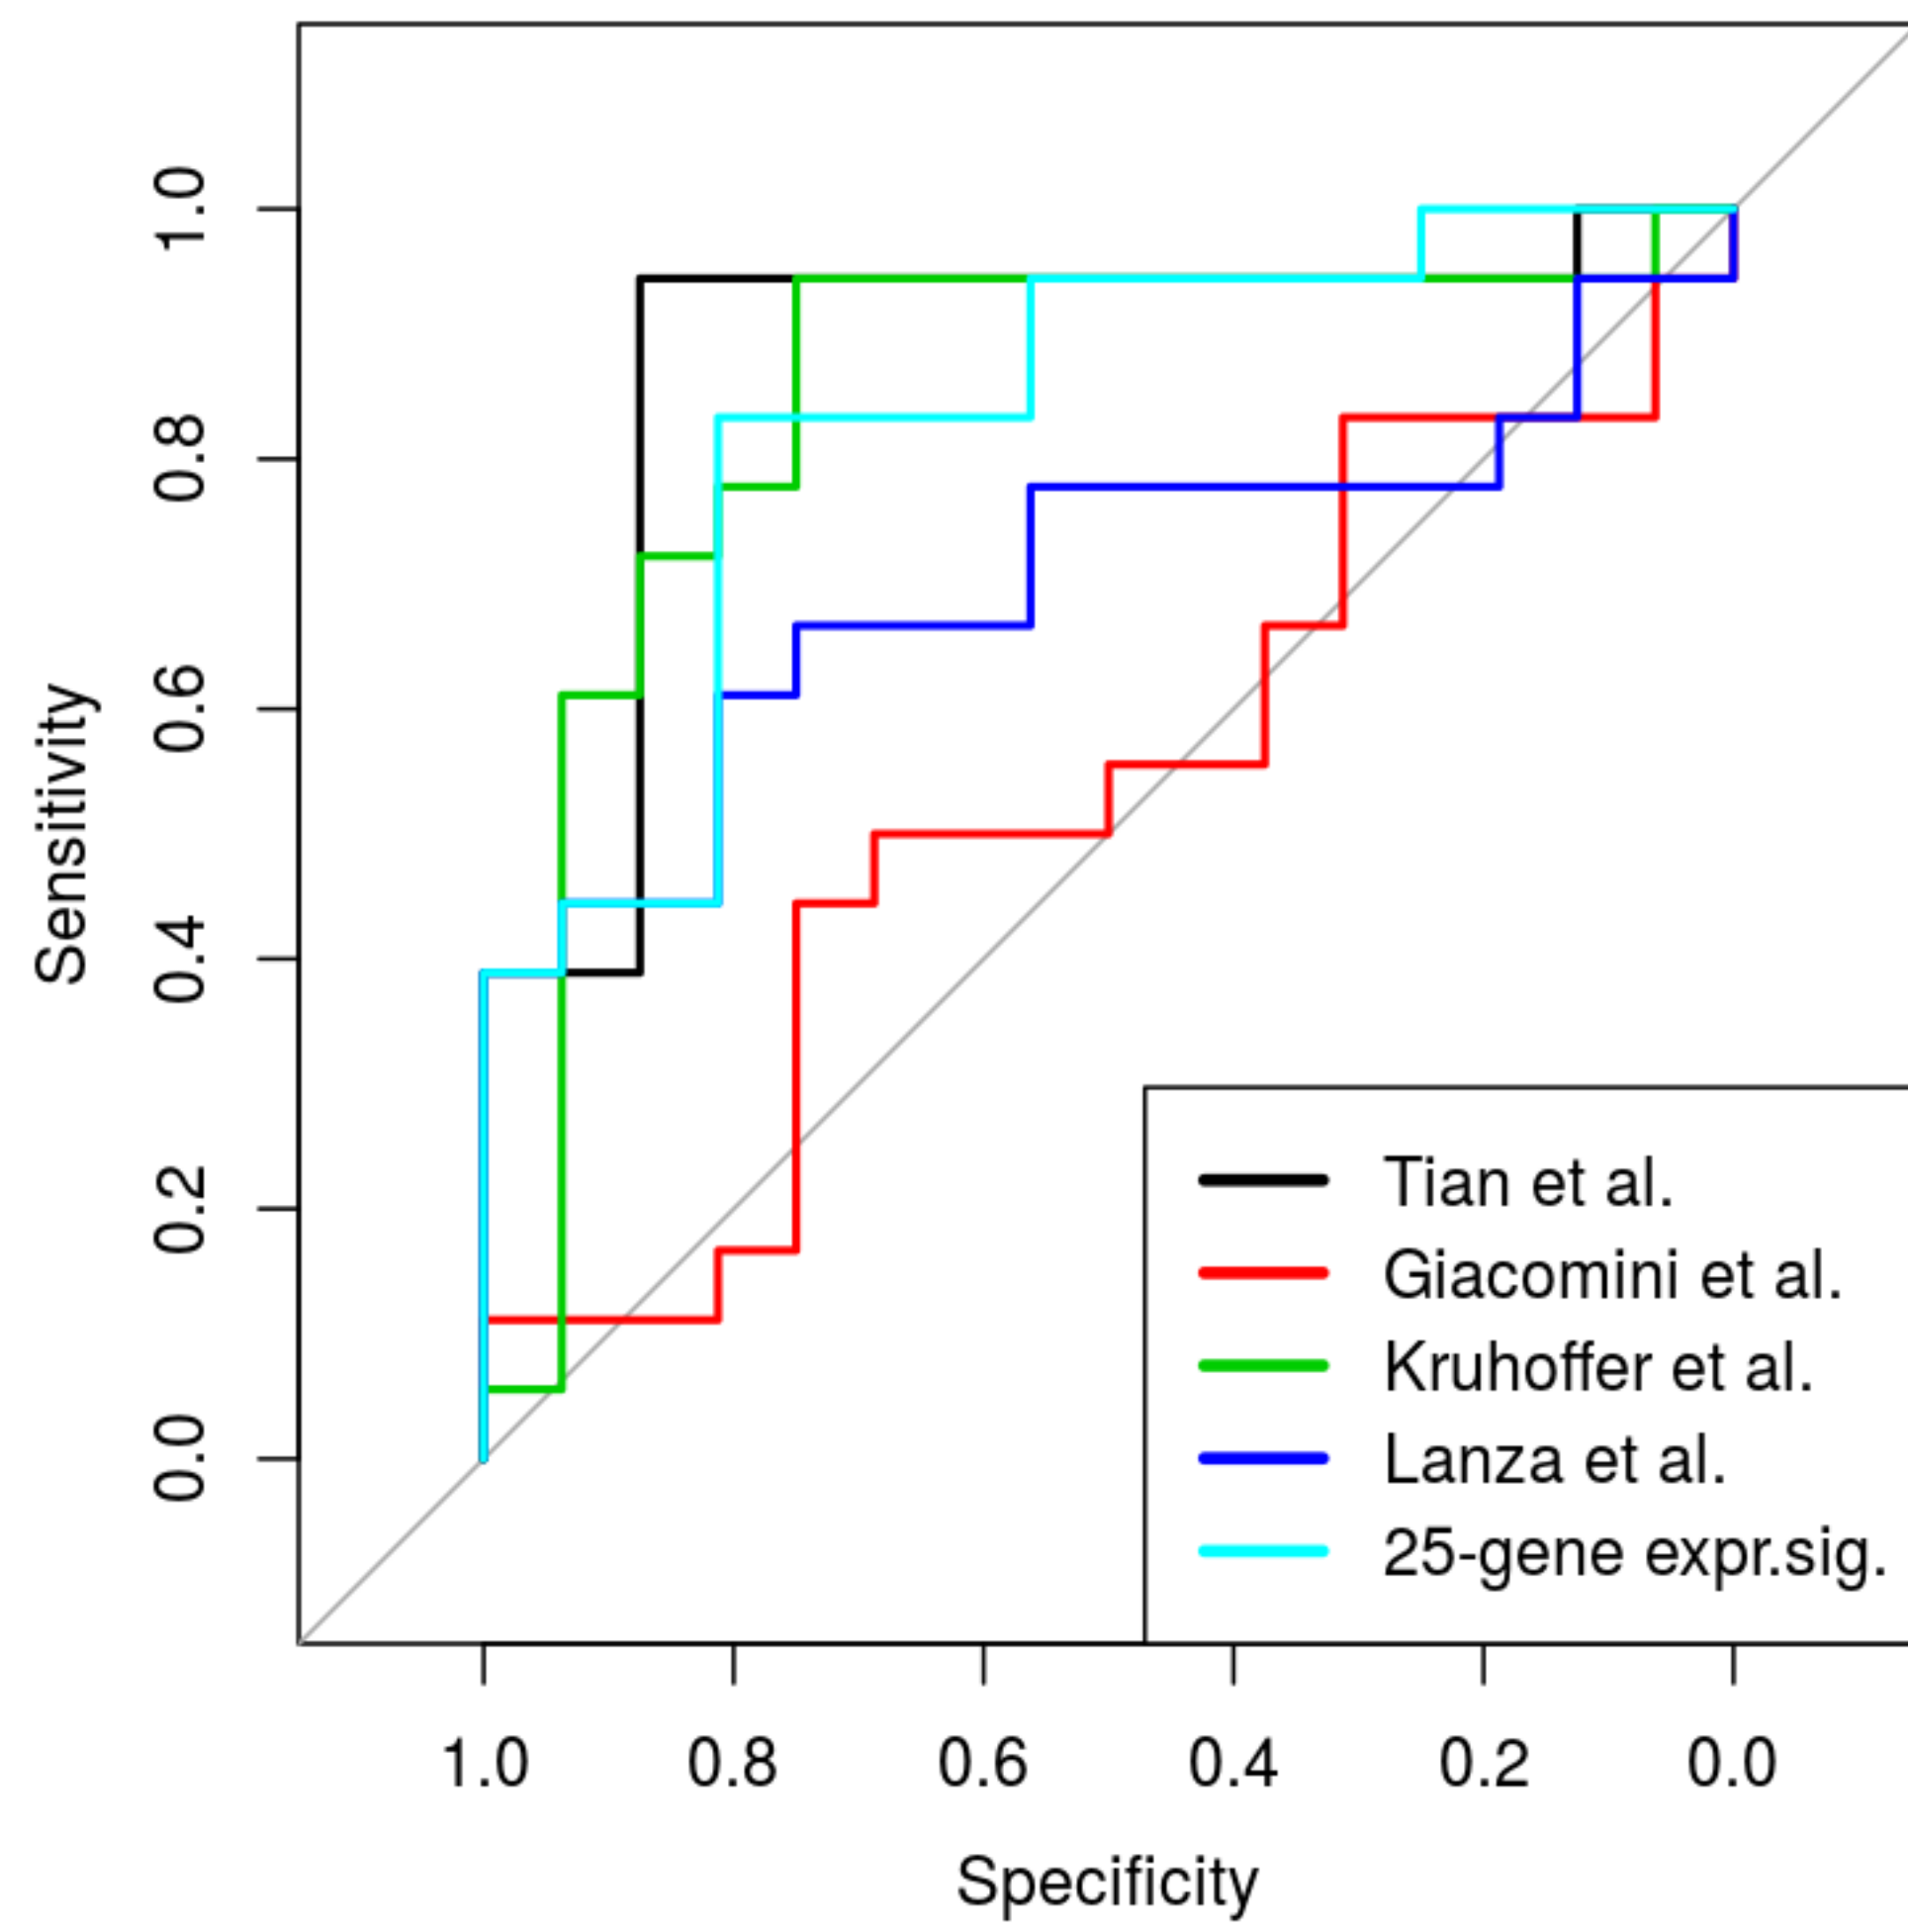**D1**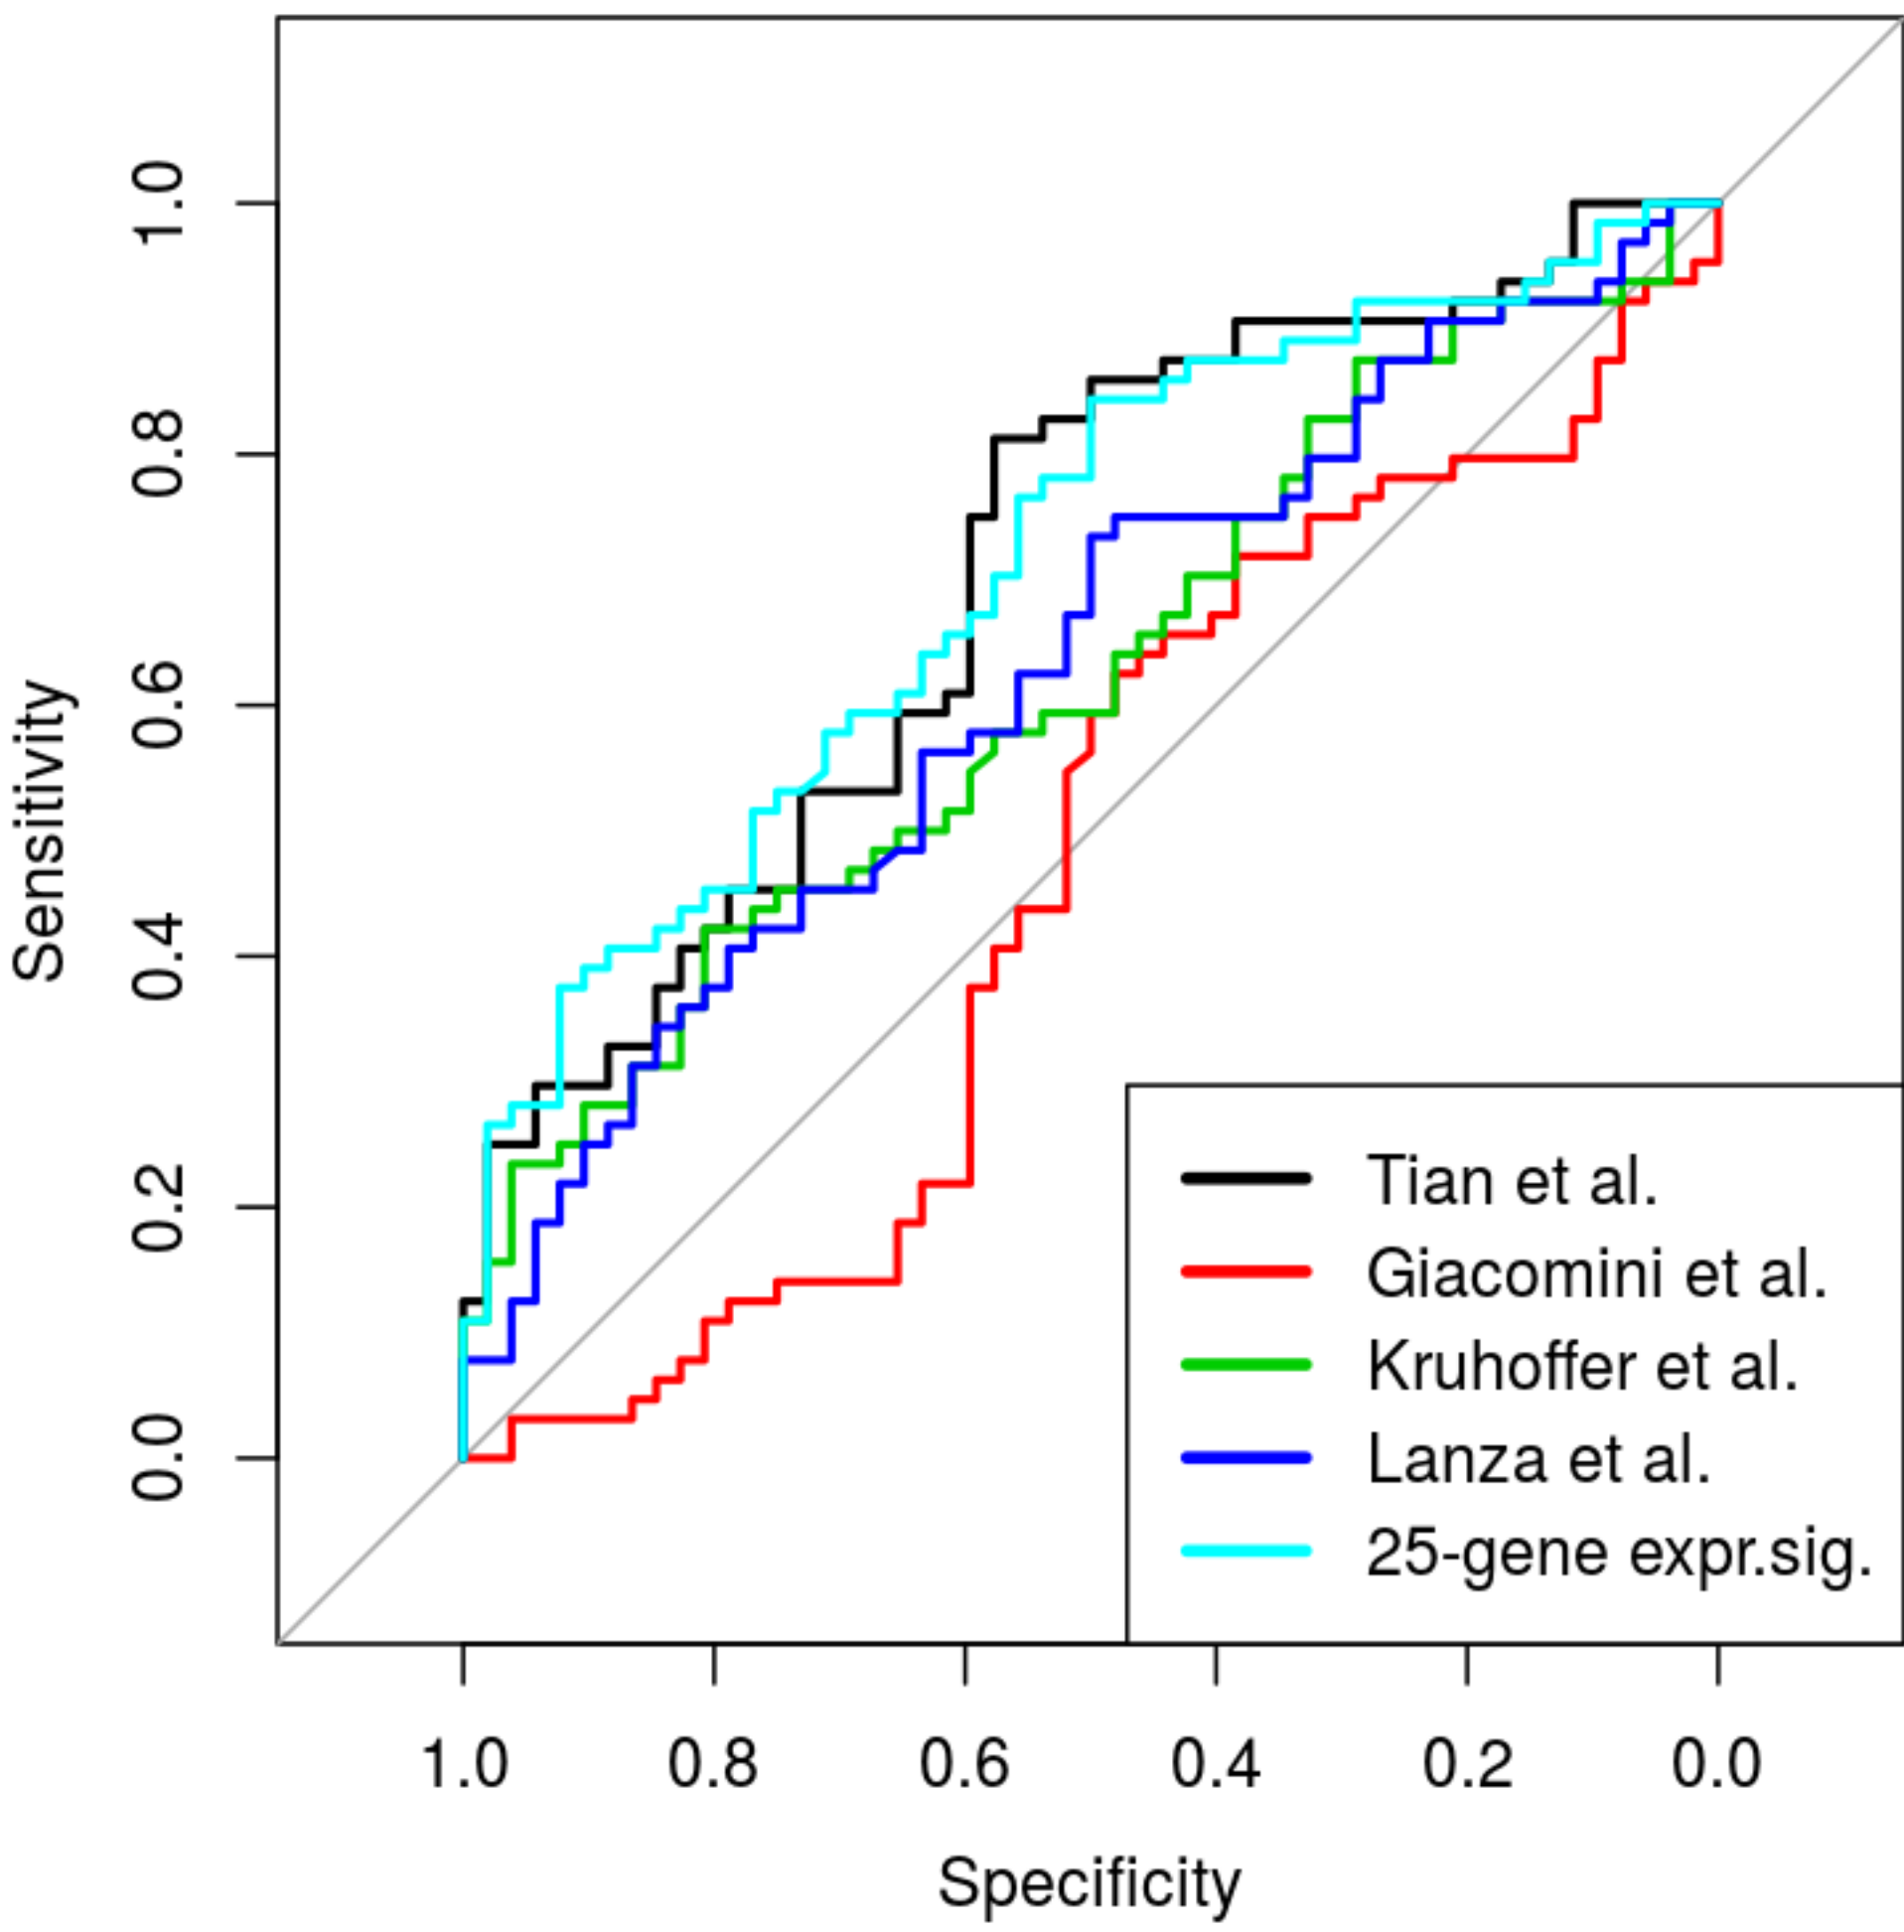**Supplementary Figure S1:**

Receiver operating characteristic curves of the proposed 25-gene expression signature (25-gene expr.sig.) and the published signatures trained exclusively on microarray data sets.

## Supplementary Figure S2:

Receiver operating characteristic curves of the proposed 25-gene expression signature in RNA-seq cohorts A1, C1, and D1 normalised with different normalisation methods. TU norm (Total Ubiquitous normalisation); TMM norm (Trimmed Mean of M-values normalisation)

Glusman et al. [1] and Wu et al. [3] compared various normalisation procedures of RNA-seq data. Based on these results, we decided to compare the performance of the proposed 25-gene expression signature on cohorts A1, C1, and D1 using TU (Total Ubiquitous) [1] and TMM (Trimmed Mean of M-values) [2] normalisation procedures. There is no significant difference in accuracy between these two normalisation methods (DeLong's test [4], adjusted  $p$ -value  $< 0.05$ ). Therefore we decided to use TMM method to normalise RNA-seq datasets to follow standard practices in the field. *NormExpression* [3] R-package was used to obtain TU normalised RNA-seq data.

[1] Glusman et al. Optimal Scaling of Digital Transcriptomes. PLoS ONE. 2013

[2] Robinson & Oshlack. A scaling normalization method for differential expression analysis of RNA-seq data. Genome Biology. 2010

[3] Wu et al. NormExpression: an R package to normalize gene expression data using evaluated methods. bioRxiv preprint. 2018

[4] DeLong et al. Comparing the areas under two or more correlated receiver operating characteristic curves: a nonparametric approach. Biometrics. 1988

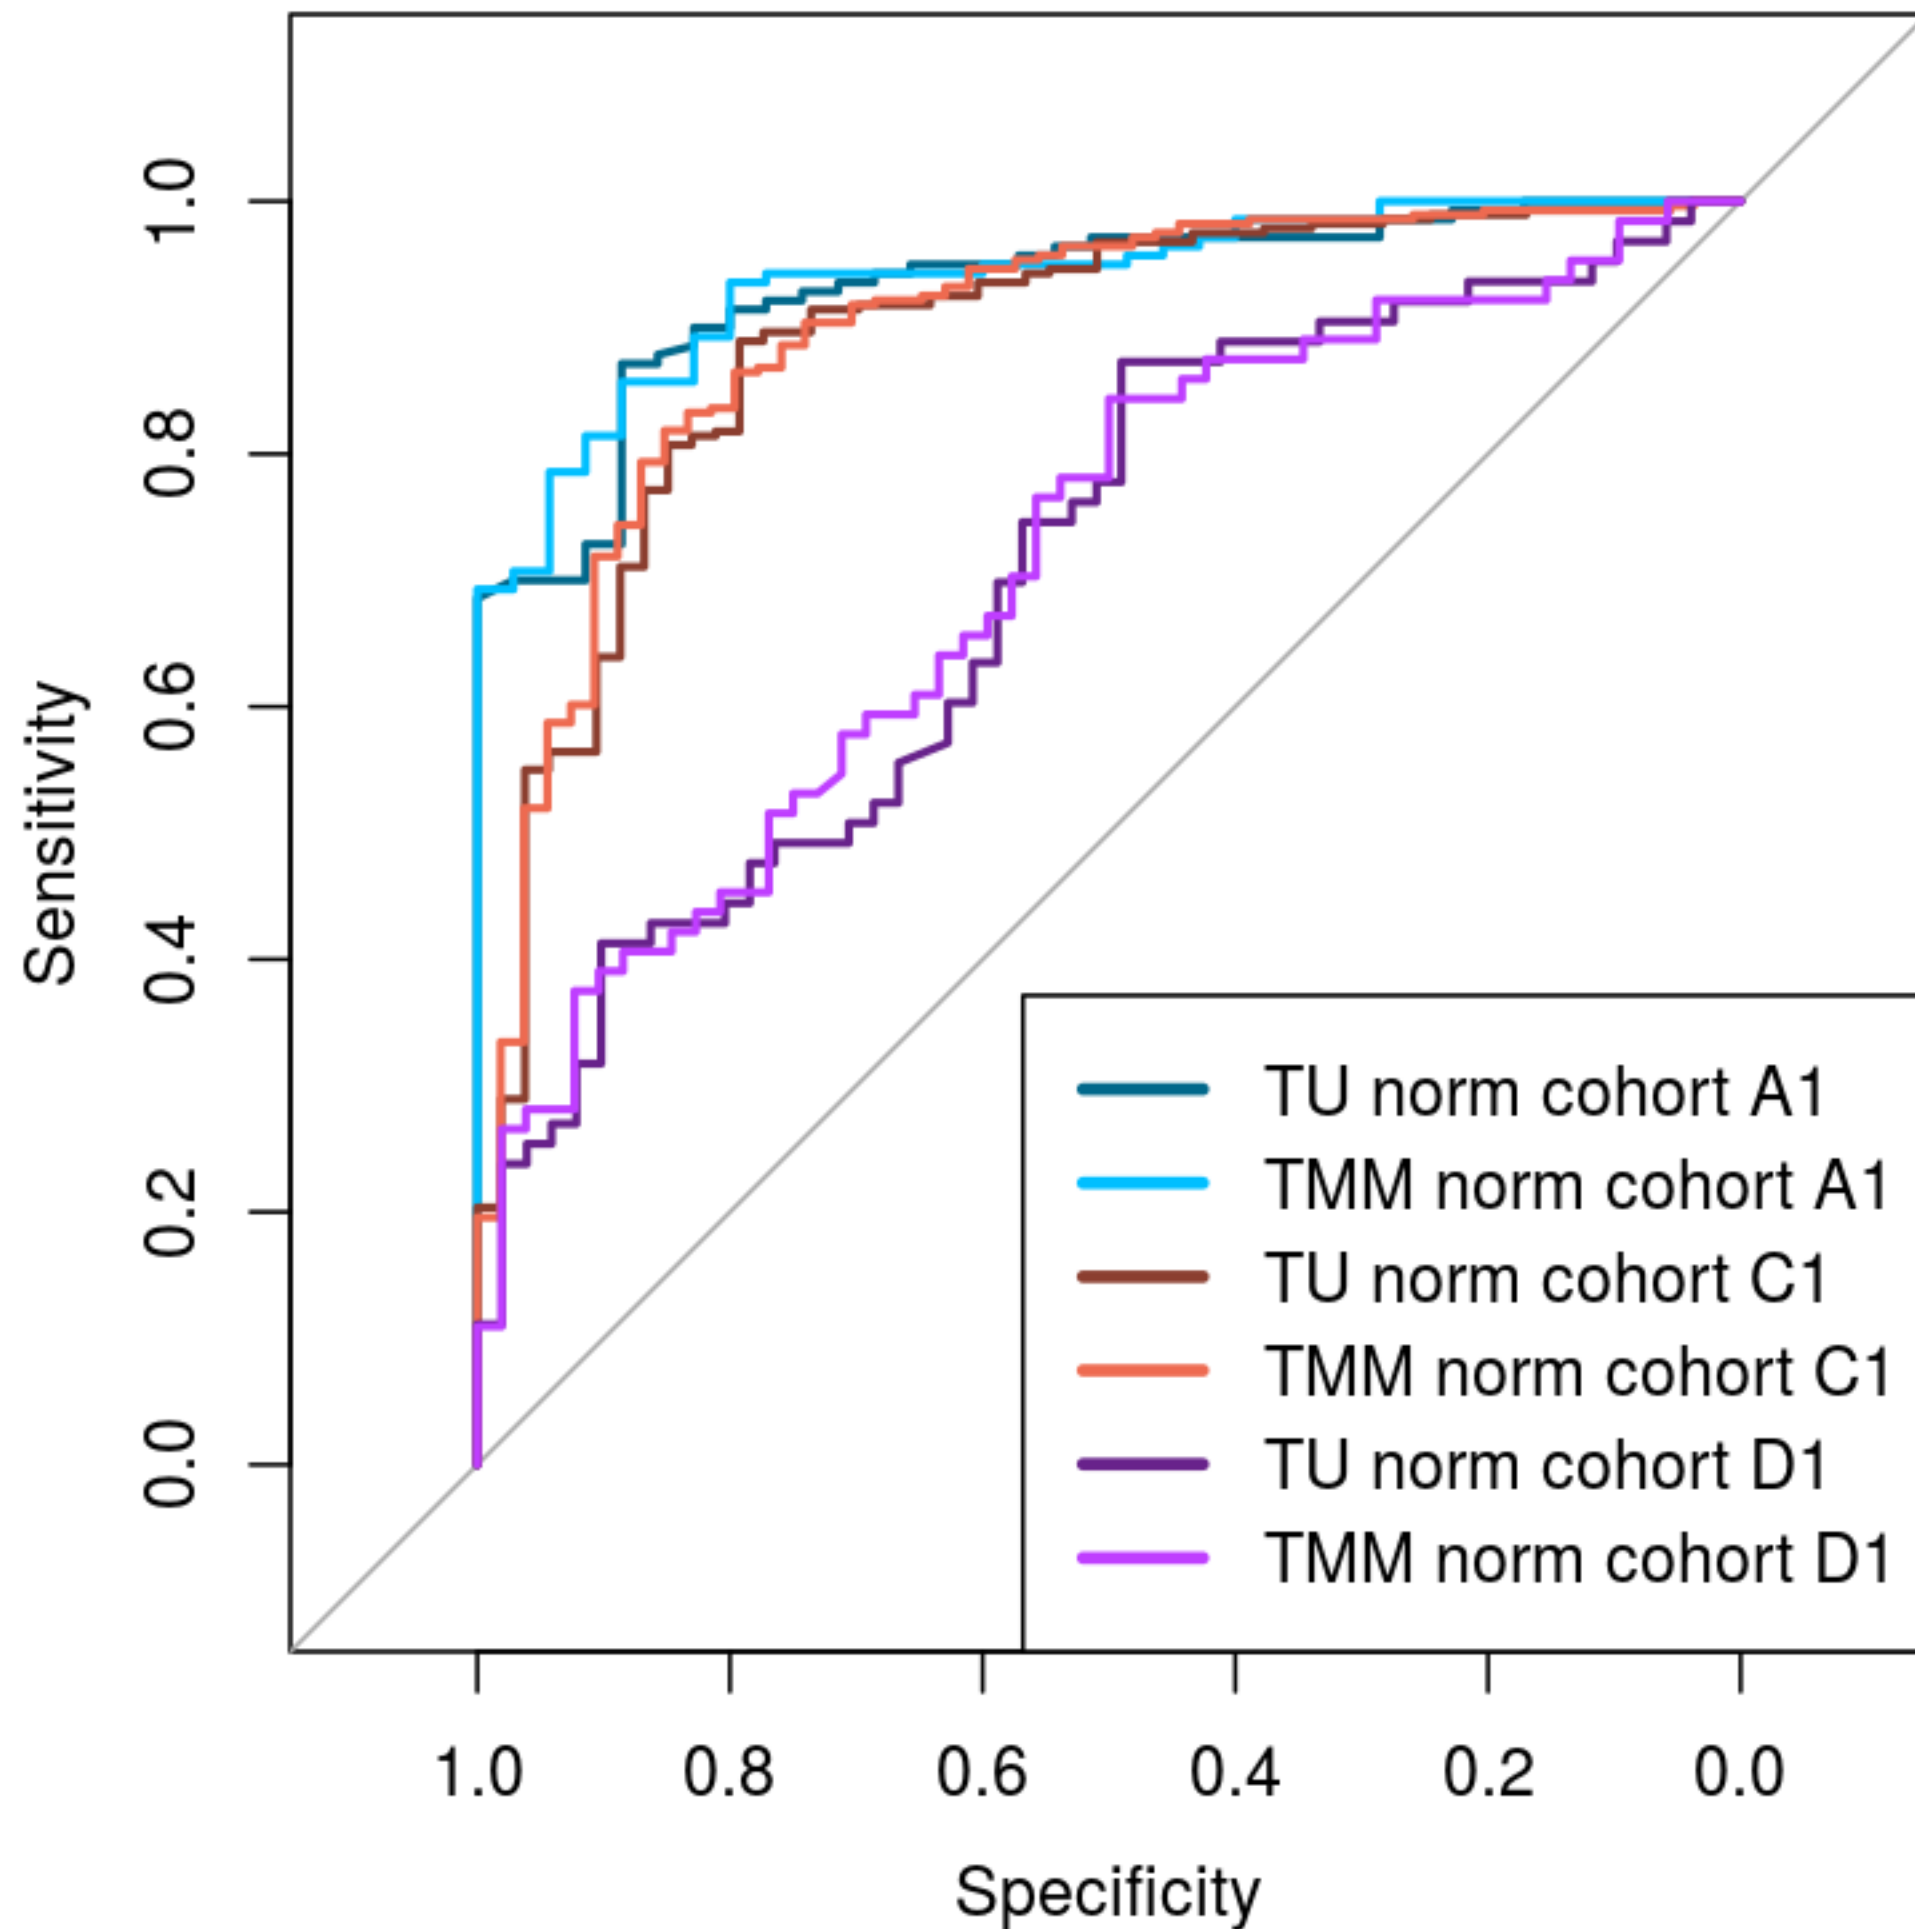

Supplementary Table S3: Performance of the 25-gene expression signature in RNA-seq cohorts A1, C1, and D1 normalised with different normalisation methods. TU (Total Ubiquitous); TMM (Trimmed Mean of M-values); AUC area under the receiver operating characteristic curve; CI confidence interval

| Cohort            | Normalisation | AUC  | 95% CI      | DeLong's test <i>p</i> -value | Tissue      | # genes used for classification |
|-------------------|---------------|------|-------------|-------------------------------|-------------|---------------------------------|
| A1 development CV | TU            | 0,93 | 0.89 – 0.97 | 0,42                          | colon       | 25                              |
|                   | TMM           | 0,94 | 0.90 – 0.97 |                               |             |                                 |
| C1                | TU            | 0,89 | 0.84 – 0.94 | 0,83                          | gastric     | 25                              |
|                   | TMM           | 0,90 | 0.85 – 0.94 |                               |             |                                 |
| D1                | TU            | 0,72 | 0.61 – 0.80 | 0,90                          | endometrial | 24                              |
|                   | TMM           | 0,71 | 0.62 – 0.81 |                               |             |                                 |
